# Supplementary material for: MicroRNA-150 suppresses cell proliferation and metastasis in hepatocellular carcinoma by inhibiting the GAB1-ERK axis
Source: PubMed Central journal article supplement (PMC4905496; doi:10.18632/oncotarget.7292), 2016-02-09
Supplement: oncotarget-07-11595-s001.pdf [file oncotarget-07-11595-s001.pdf]

## SUPPLEMENTARY FIGURES AND TABLE

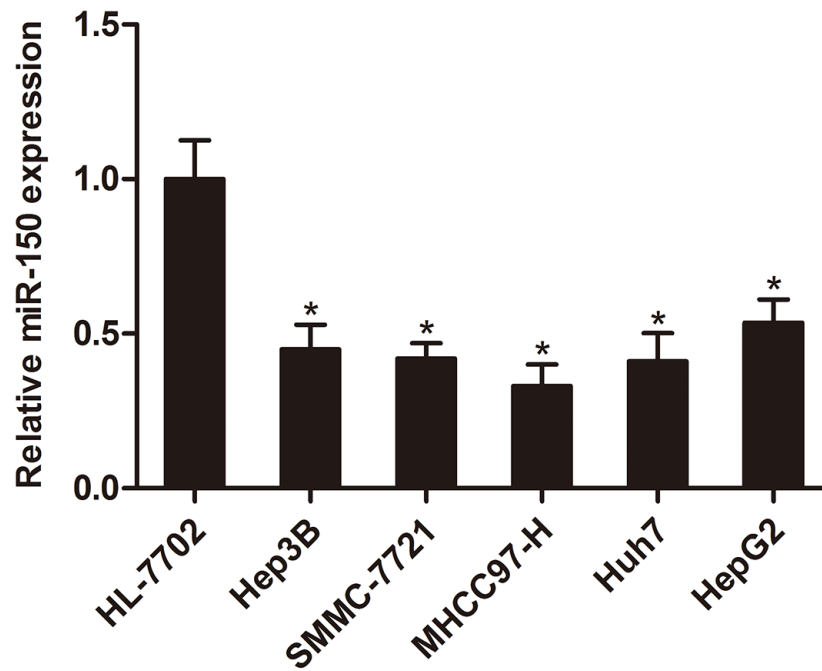

**Supplementary Figure 1: miR-150 is significantly downregulated in HCC cell lines.** Relative expression levels of miR-150 in a normal human hepatocyte cell line (HL-7702) and HCC cell lines (Hep3B, SMMC-7721, MHCC97-H, Huh7, HepG2). \* $P < 0.05$ .

**Lenti-miR-NC**

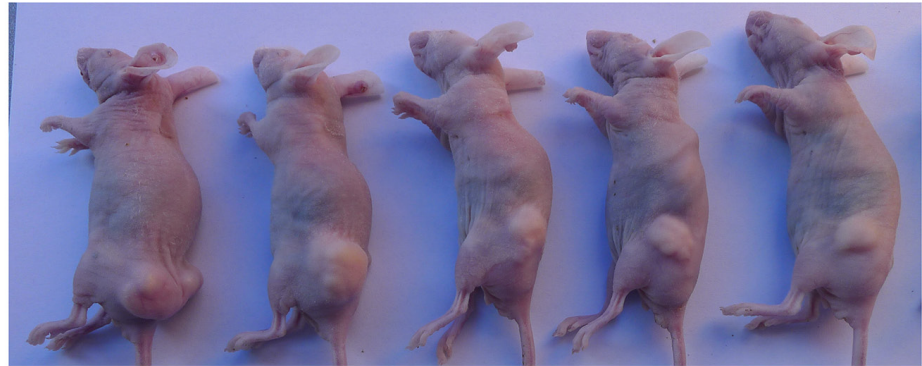

**Lenti-miR-150**

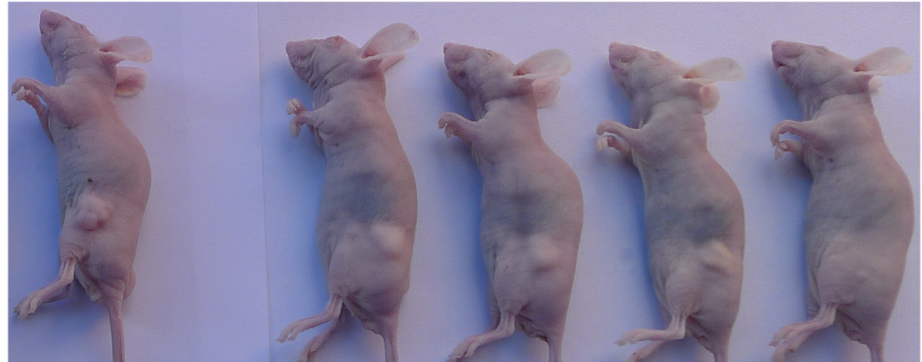

**Supplementary Figure 2: miR-150 suppresses tumor growth *in vivo*.** Transduced MHCC97-H cells were injected subcutaneously into nude mice (n=5). After 28 days, the mice were euthanized, and the tumors were excised. All the mice with implanted HCC cells are shown.

**Supplementary Table 1: Primer sets used for qRT-PCR**

| <b>Primer</b>           | <b>Sequence</b>                                           |
|-------------------------|-----------------------------------------------------------|
| miR-150-RT              | 5'-gtcgtatccagtgccaggggccgaggtattcgcactggatacgaacACTGG-3' |
| miR-150- Forward        | 5'-tcggcgTCTCCCAACCCTTGTAC-3'                             |
| miR-150- Reverse        | 5'-GTCGTATCCAGTGCAGGGTCCGAGGT-3'                          |
| U6-RT                   | 5'-AAAATATGGAACGCTTCACGAATTTG-3'                          |
| U6- Forward             | 5'-CTCGCTTCGGCAGCACATATACT-3'                             |
| U6- Reverse             | 5'-ACGCTTCACGAATTTGCGTGTC-3'                              |
| GAB1- Forward           | 5'-GATGGTTCGTGTTACGCAGTG-3'                               |
| GAB1- Reverse           | 5'-CGCTGTCTGCTACCAAGTAGAA-3'                              |
| $\beta$ -actin- Forward | 5'-TAGTTGCGTTACACCCTTTCTTG-3'                             |
| $\beta$ -actin- Reverse | 5'-TCACCTTCACCGTCCAGTTT-3'                                |
